# Supplementary figures and images for: Visualization of the type III secretion mediated Salmonella–host cell interface using cryo-electron tomography
Source: eLife journal article supplement (doi:10.7554/elife.39514), 2018-10-03

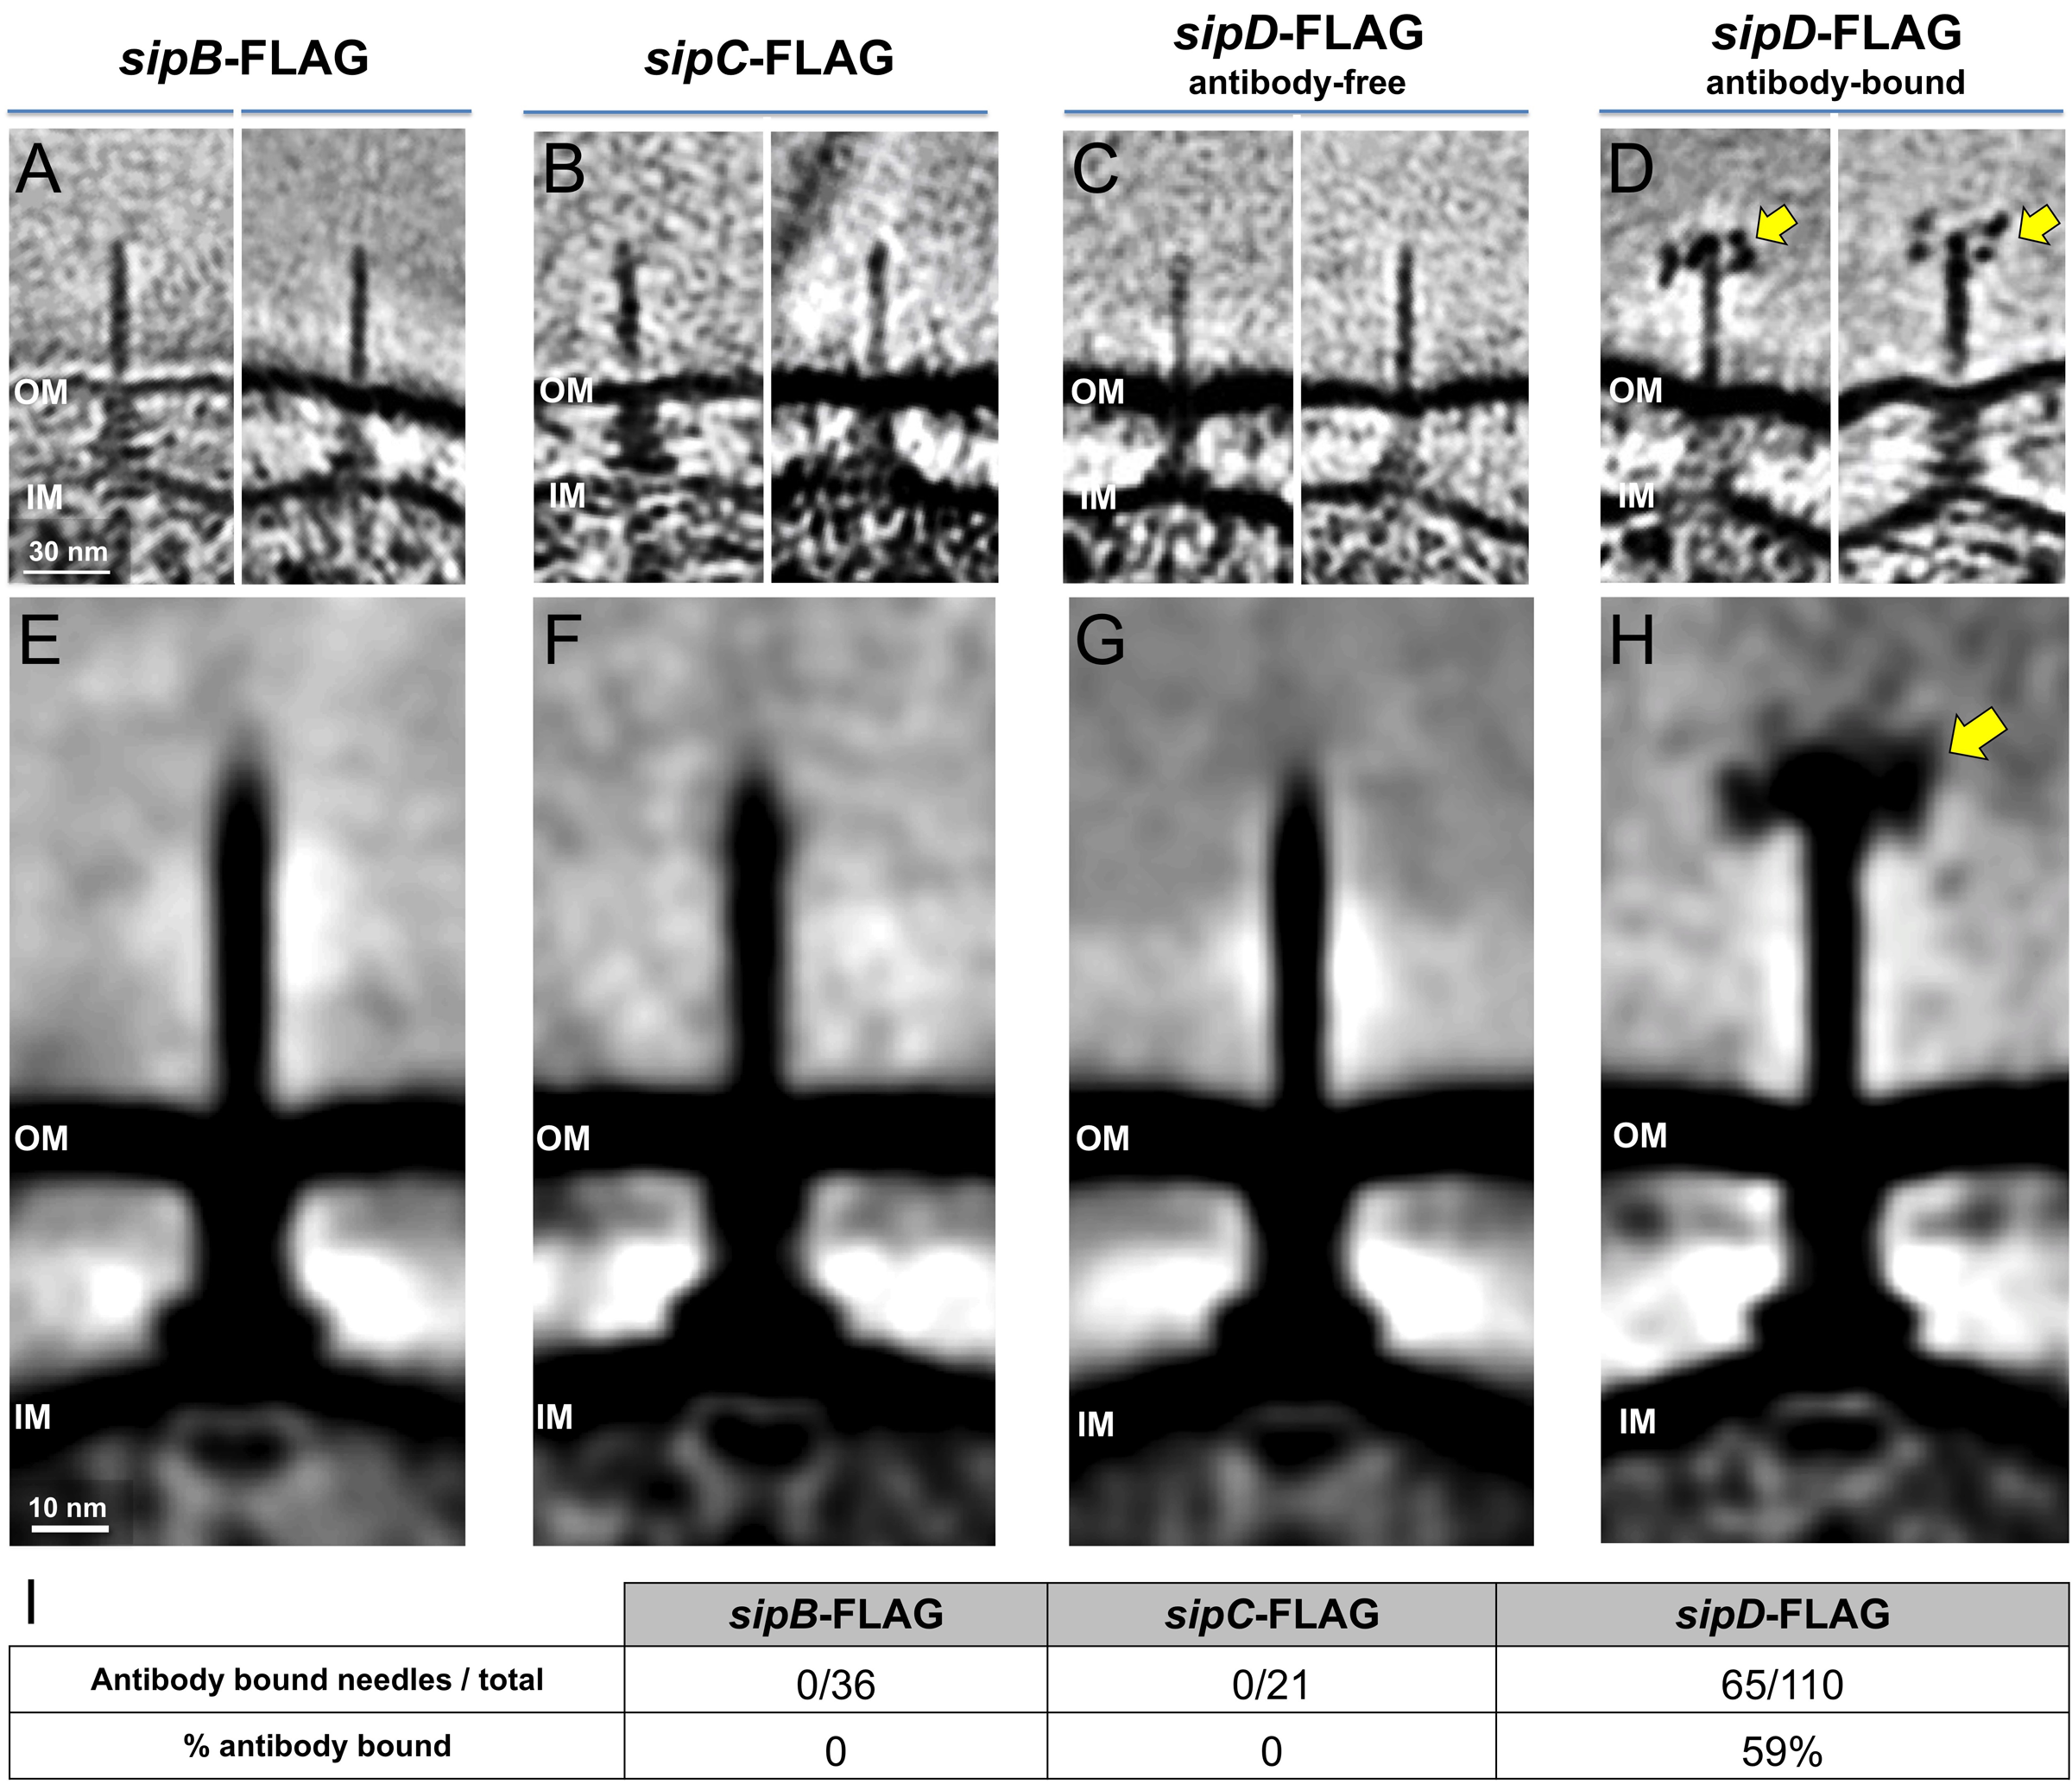

Supplement: supp [file elife-39514-supp-v1.zip › elife_poa_e39514_Figure_1_figure_supplement_1.tif]

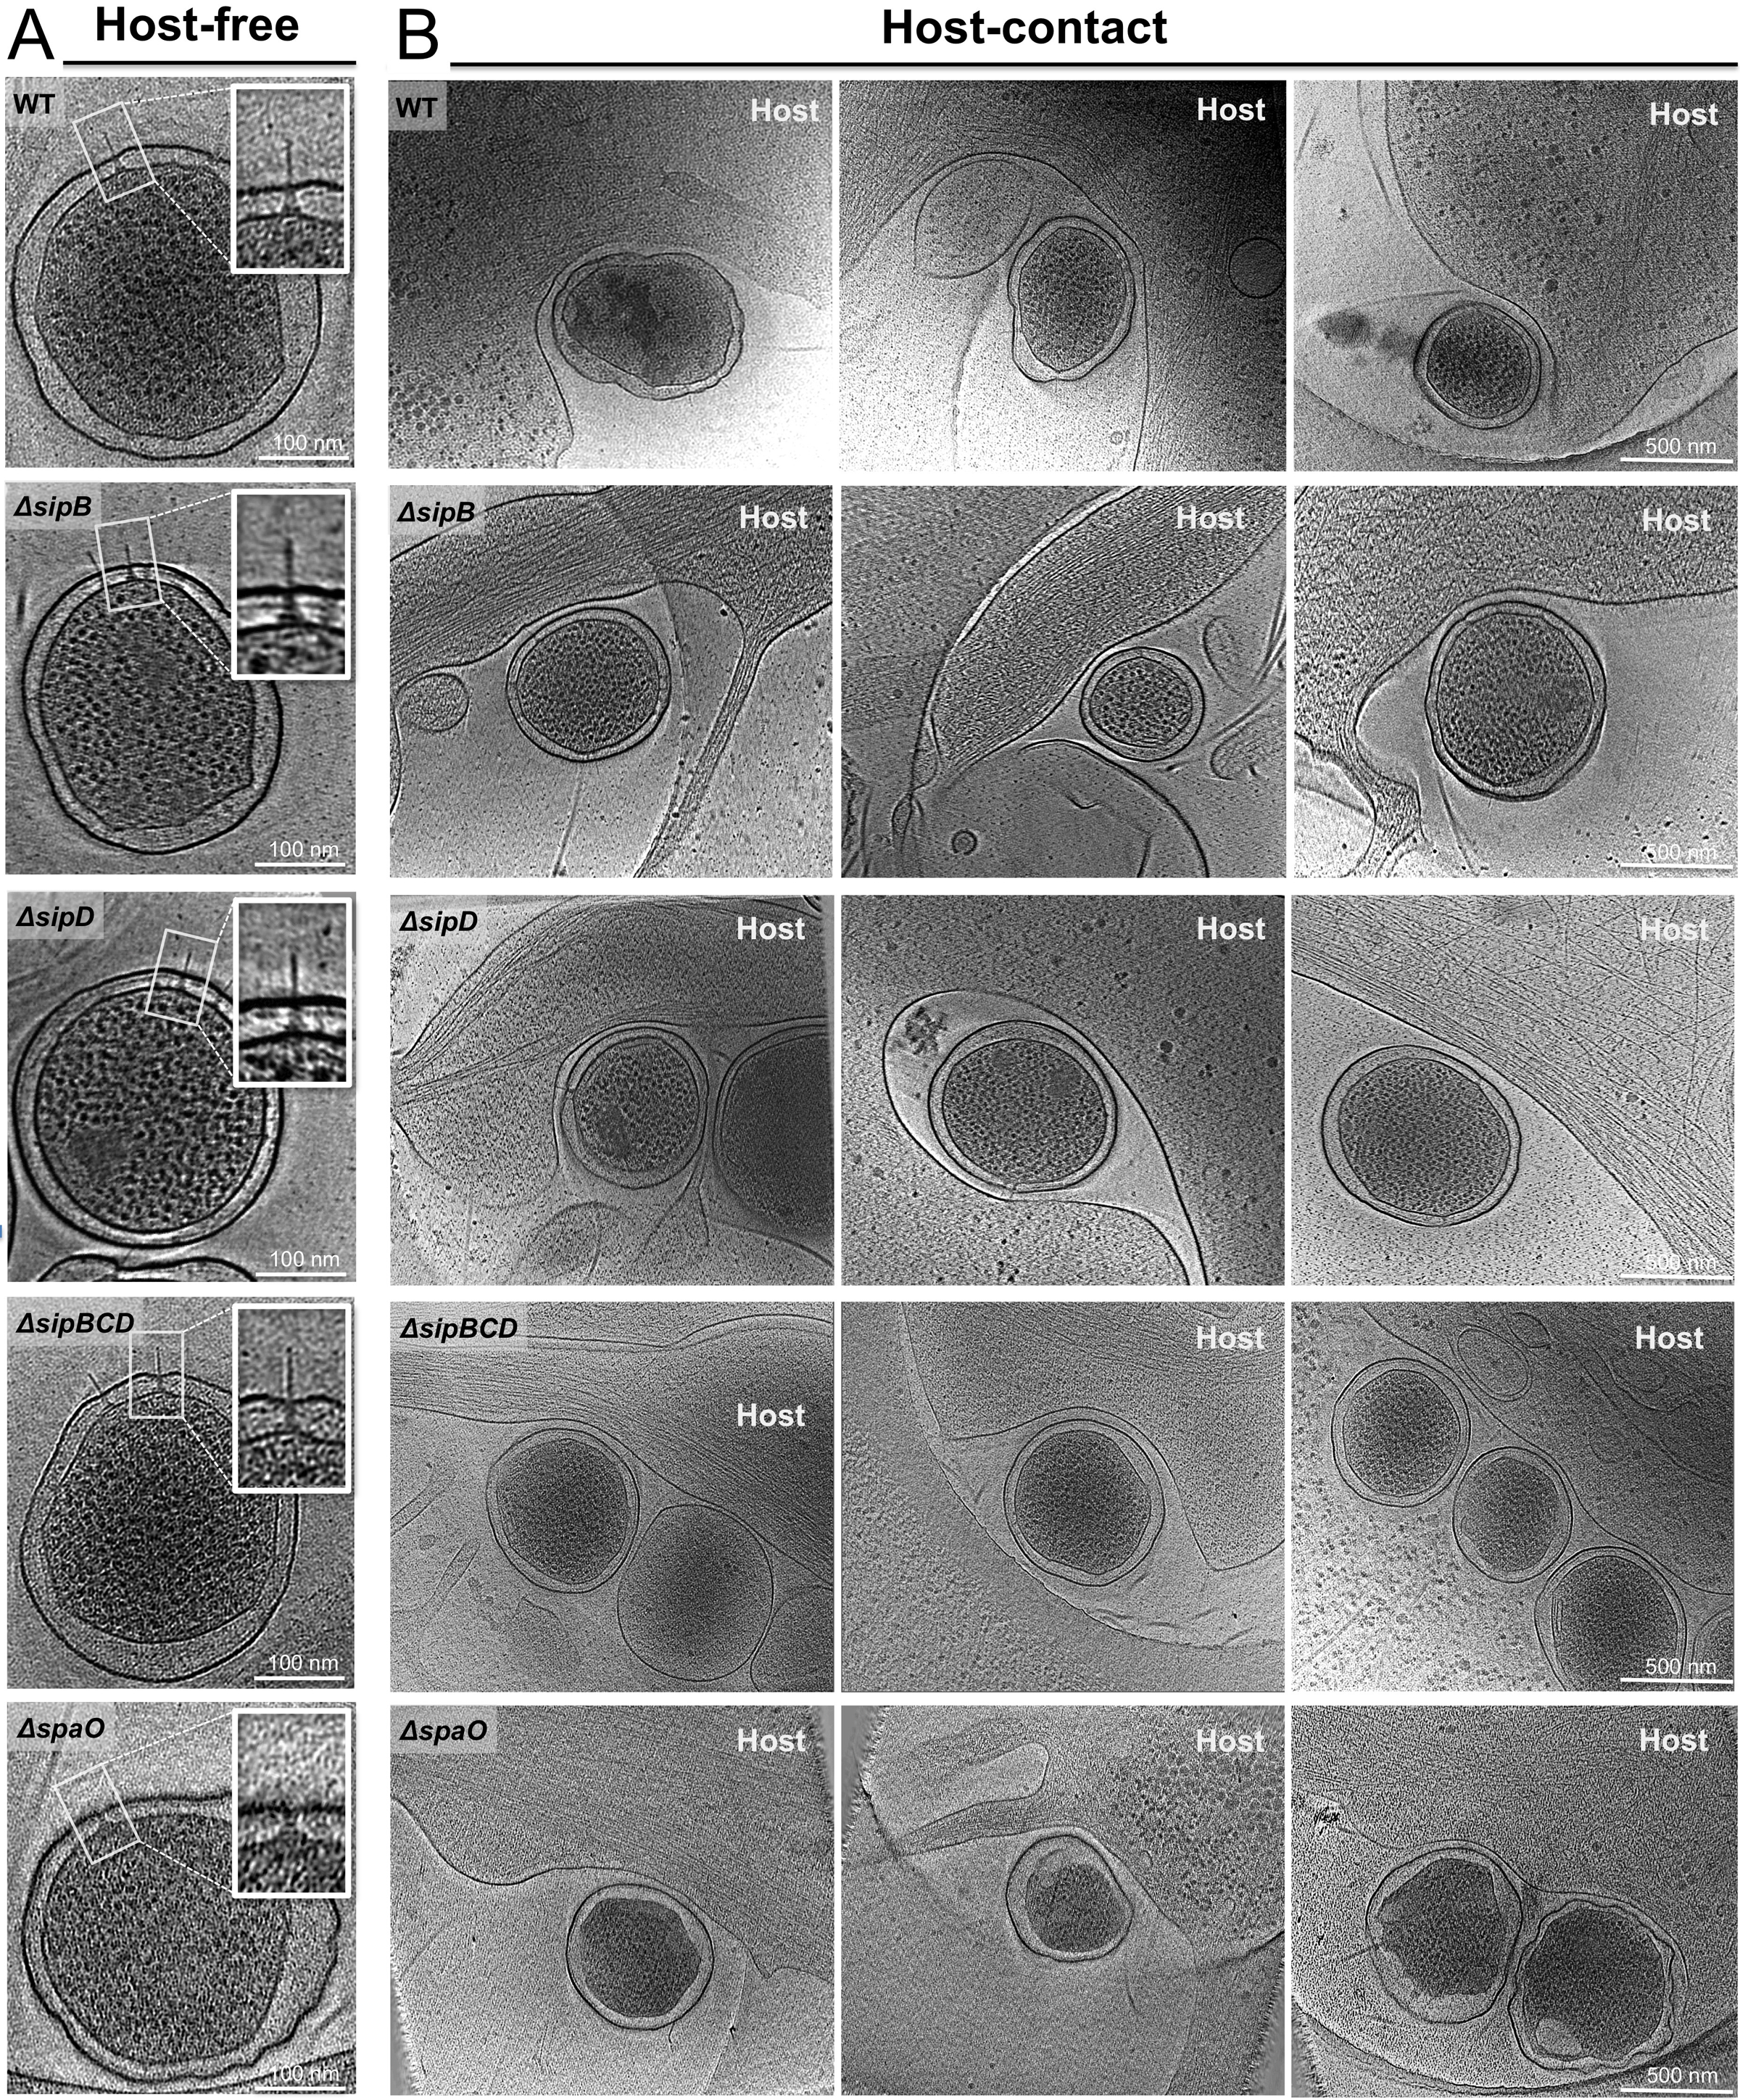

Supplement: supp [file elife-39514-supp-v1.zip › elife_poa_e39514_Figure_4_figure_supplement_1.tif]

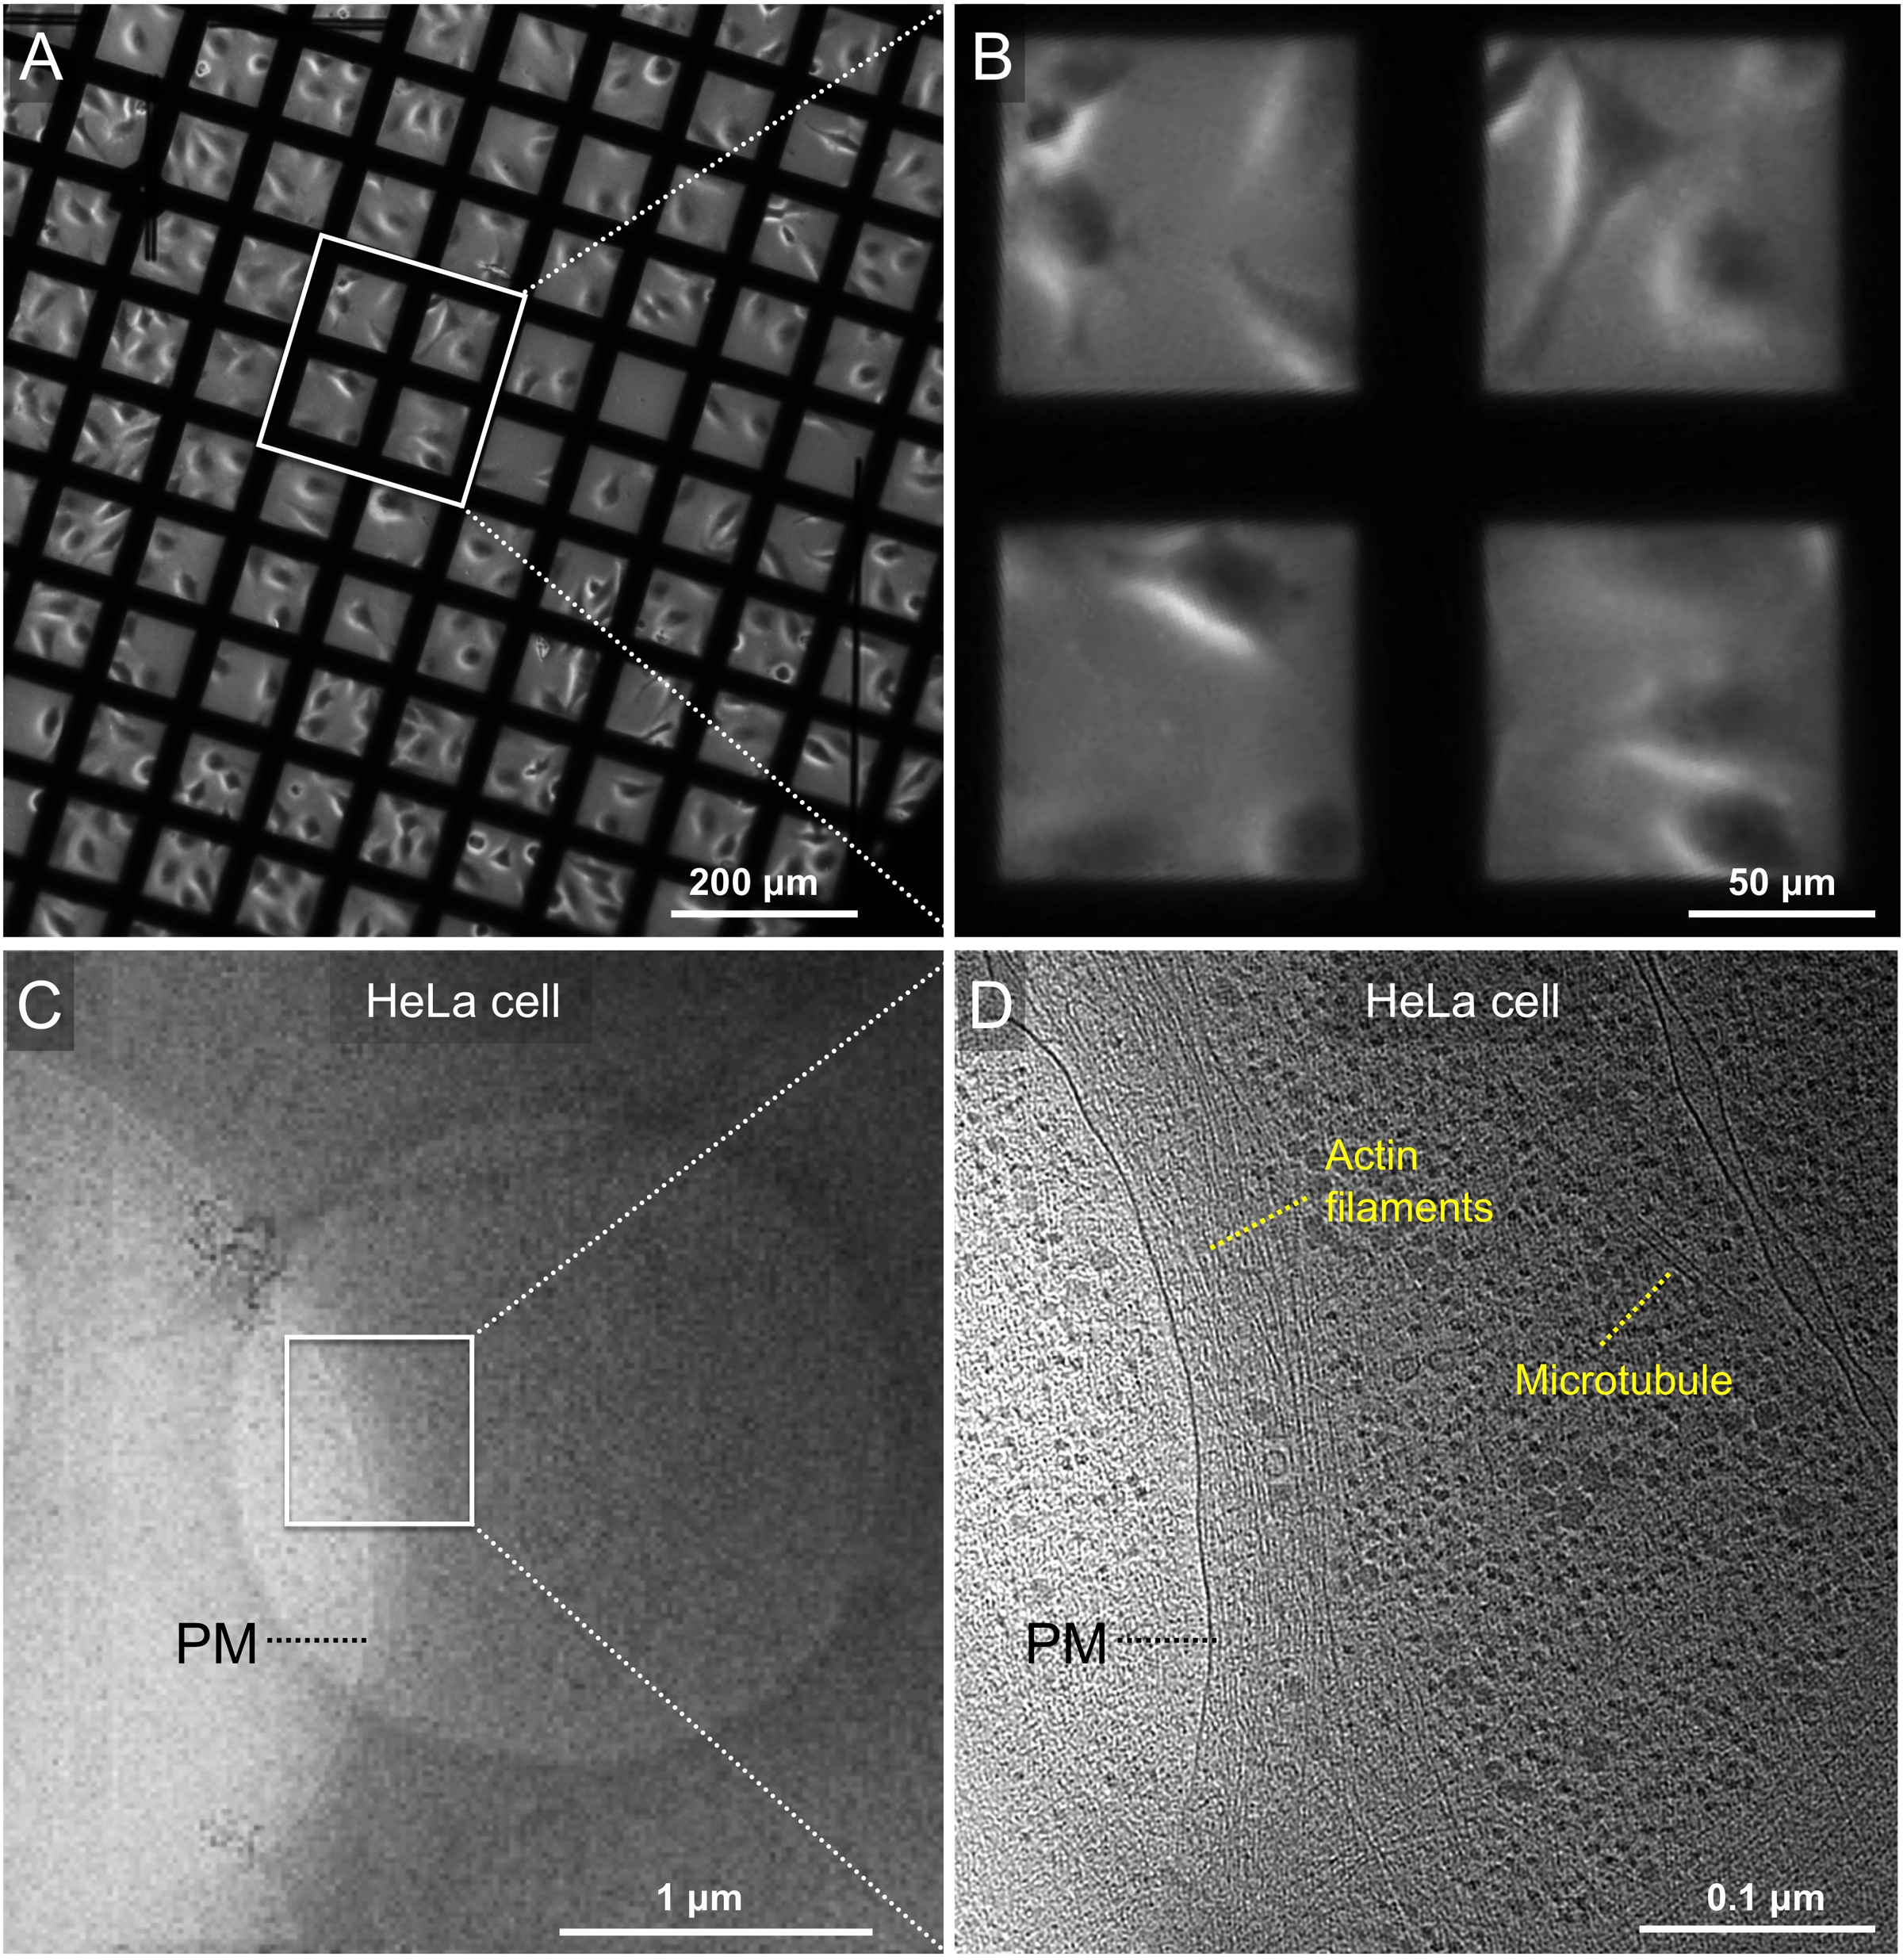

Supplement: supp [file elife-39514-supp-v1.zip › elife_poa_e39514_Figure_2_figure_supplement_1.tif]

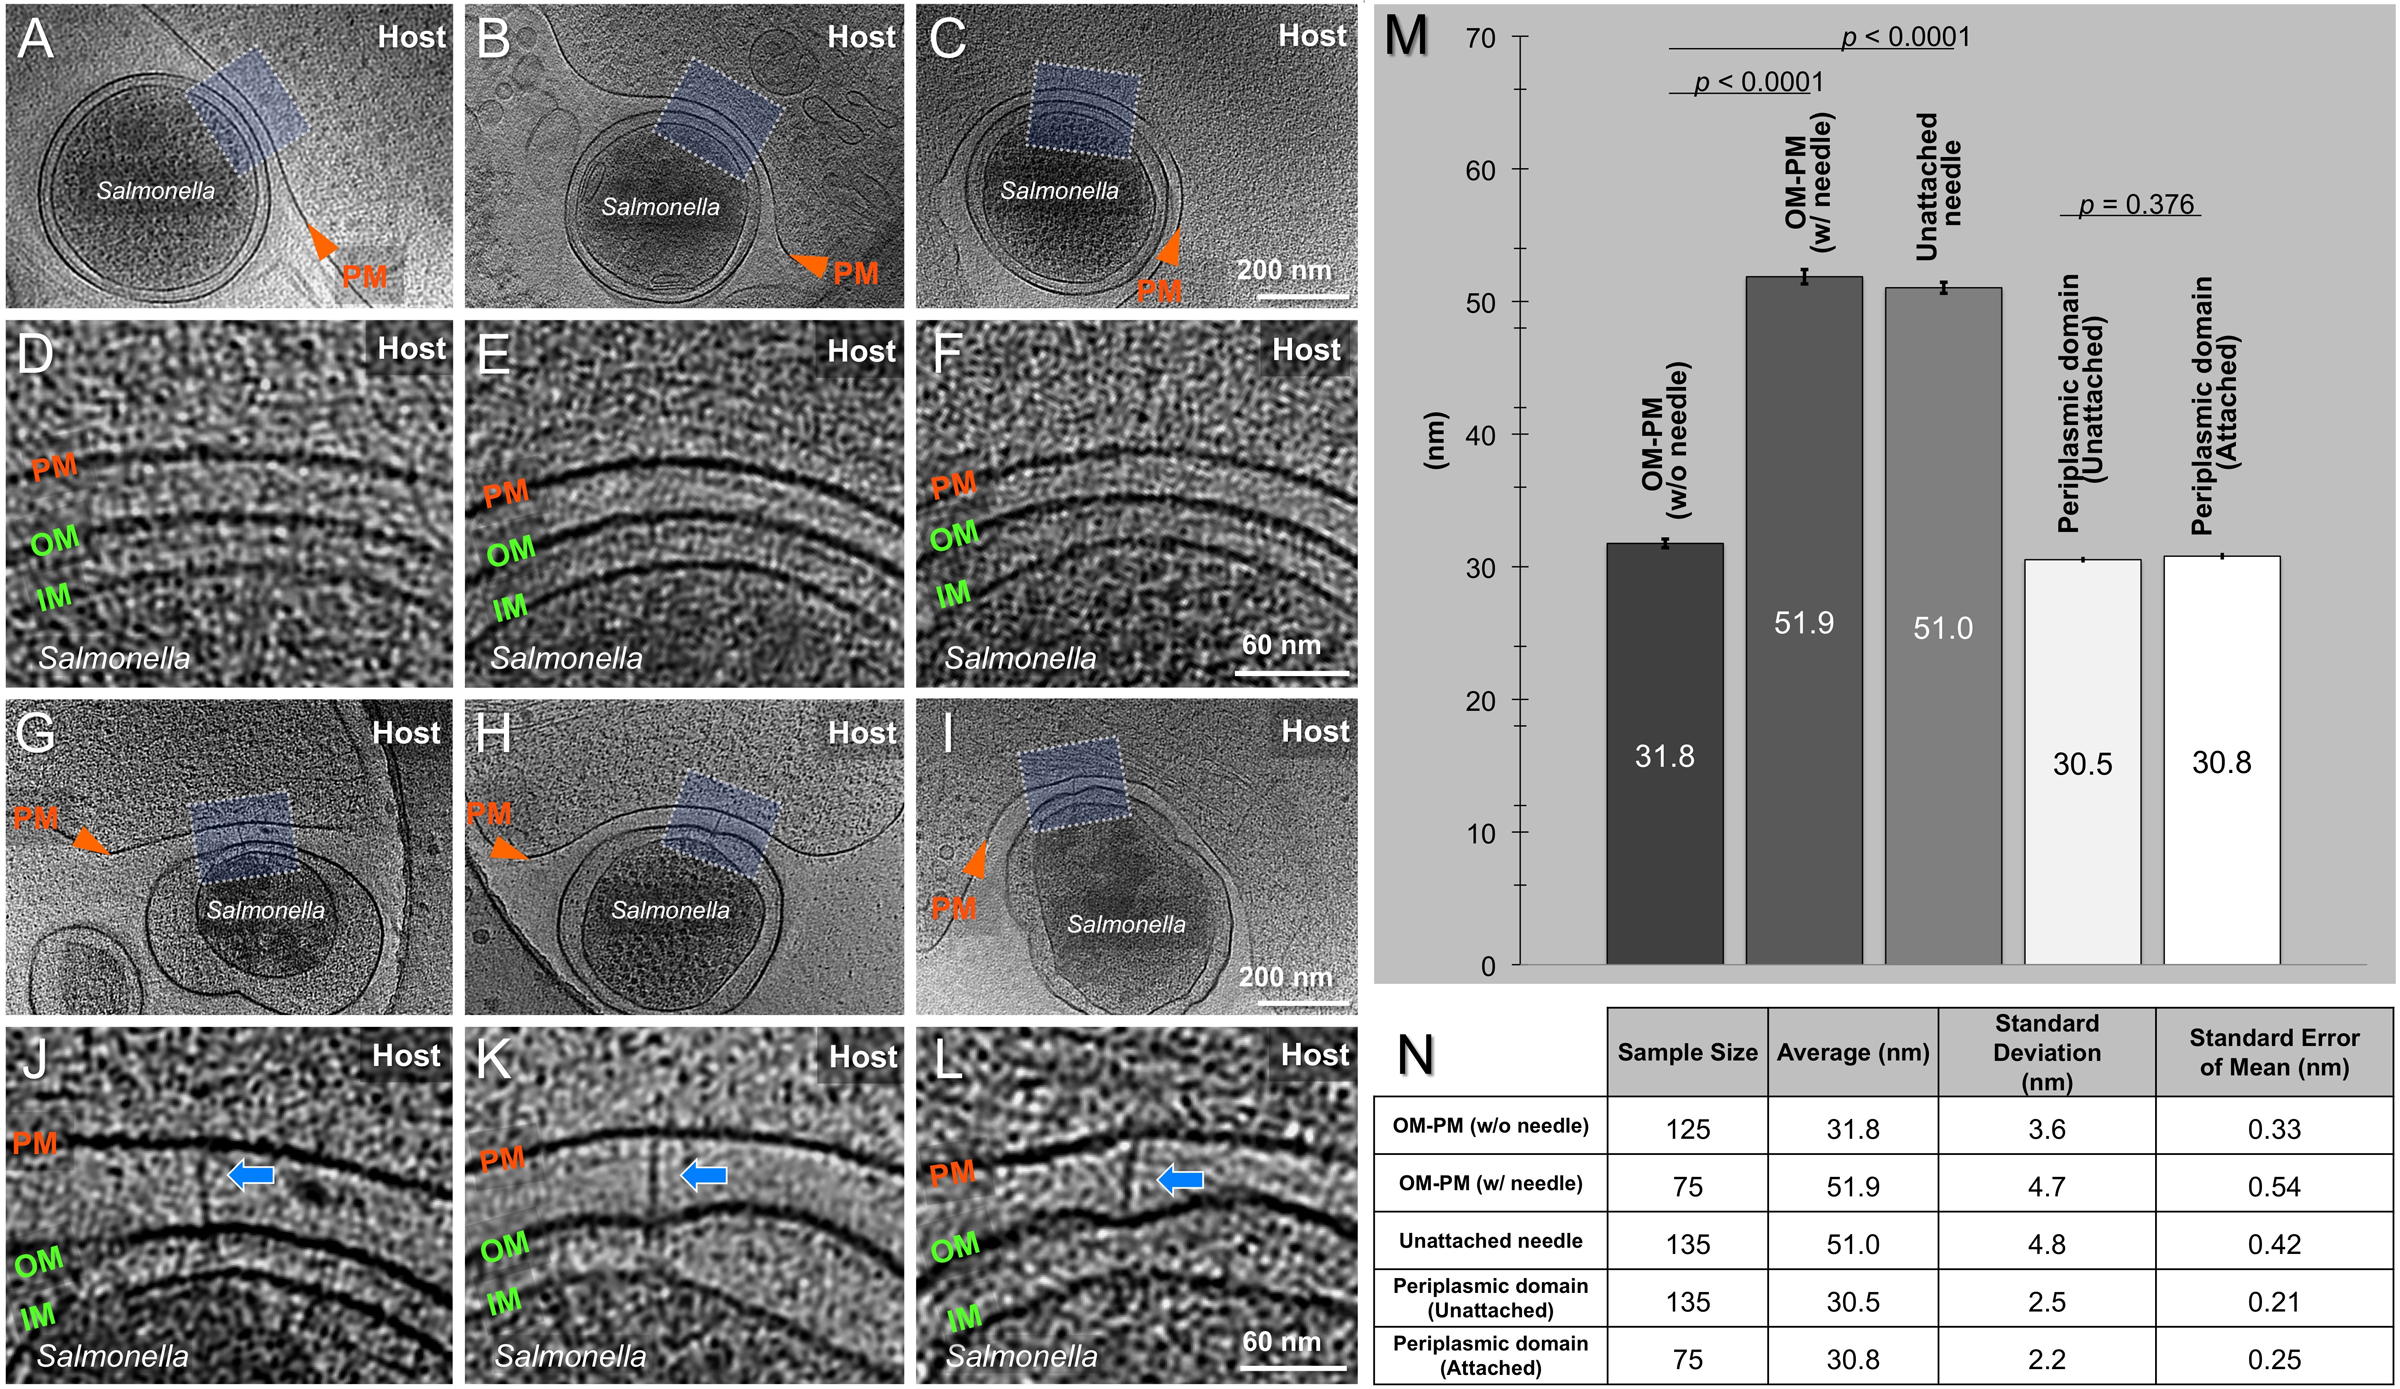

Supplement: supp [file elife-39514-supp-v1.zip › elife_poa_e39514_Figure_2_figure_supplement_2.tif]
